# Supplementary material for: Transcription of Nanofibrous Cerium Phosphate Using a pH-Sensitive Lipodipeptide Hydrogel Template
Source: Gels. 2017 Jun 10;3(2):23. doi: 10.3390/gels3020023 (PMC6318699; doi:10.3390/gels3020023)
Supplement: Supplementary file 1 [file gels-03-00023-s001.pdf]

# Supplementary Materials for: Transcription of Nanofibrous Cerium Phosphate Using a pH-Sensitive Lipodipeptide Hydrogel Template

Mario Llusar, Beatriu Escuder, Juan de Dios López-Castro, Susana Trasobares and Guillermo Monrós

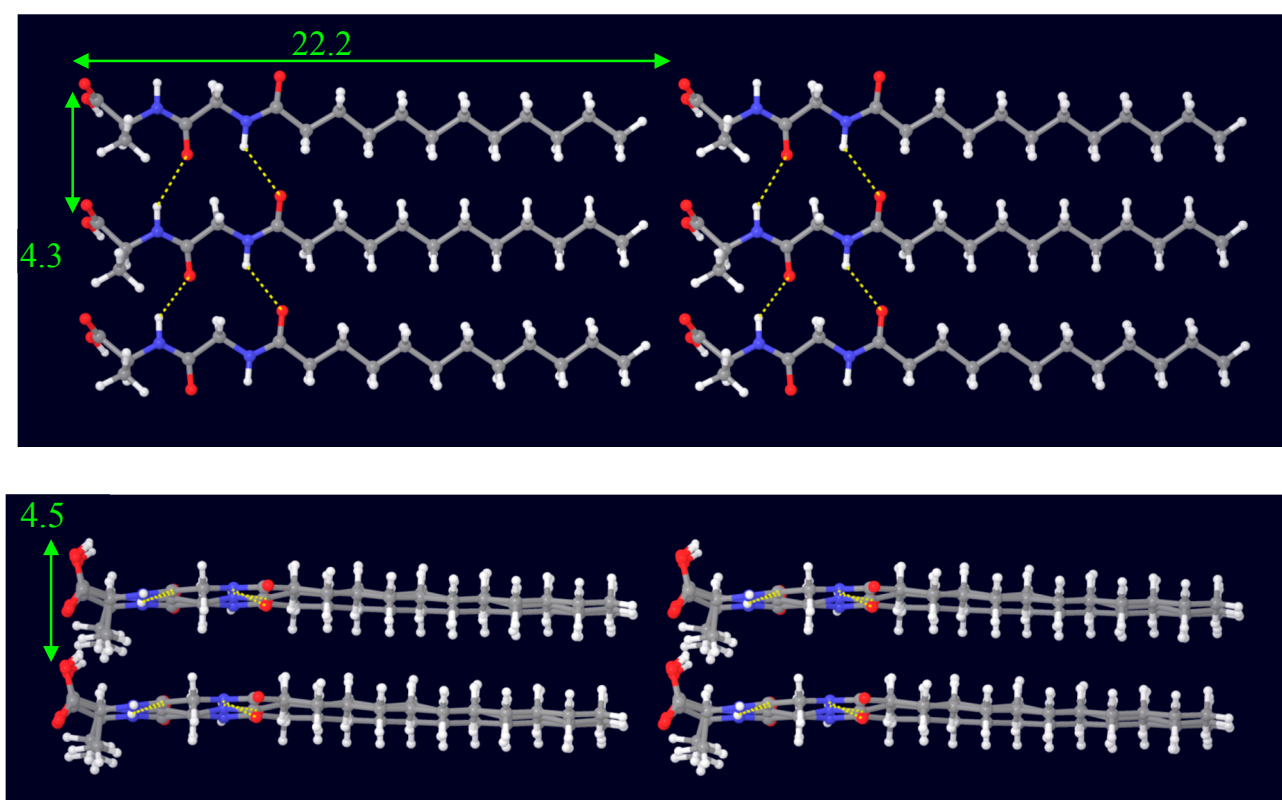

**Figure S1.** Alternative Energy-minimized structure models (MACROMODEL 7.0, AMBER\*) [98] for the packing of compound *C12GA* in phosphorylated xerogel (non-polar hydrogens are omitted for clarity in the bottom image).

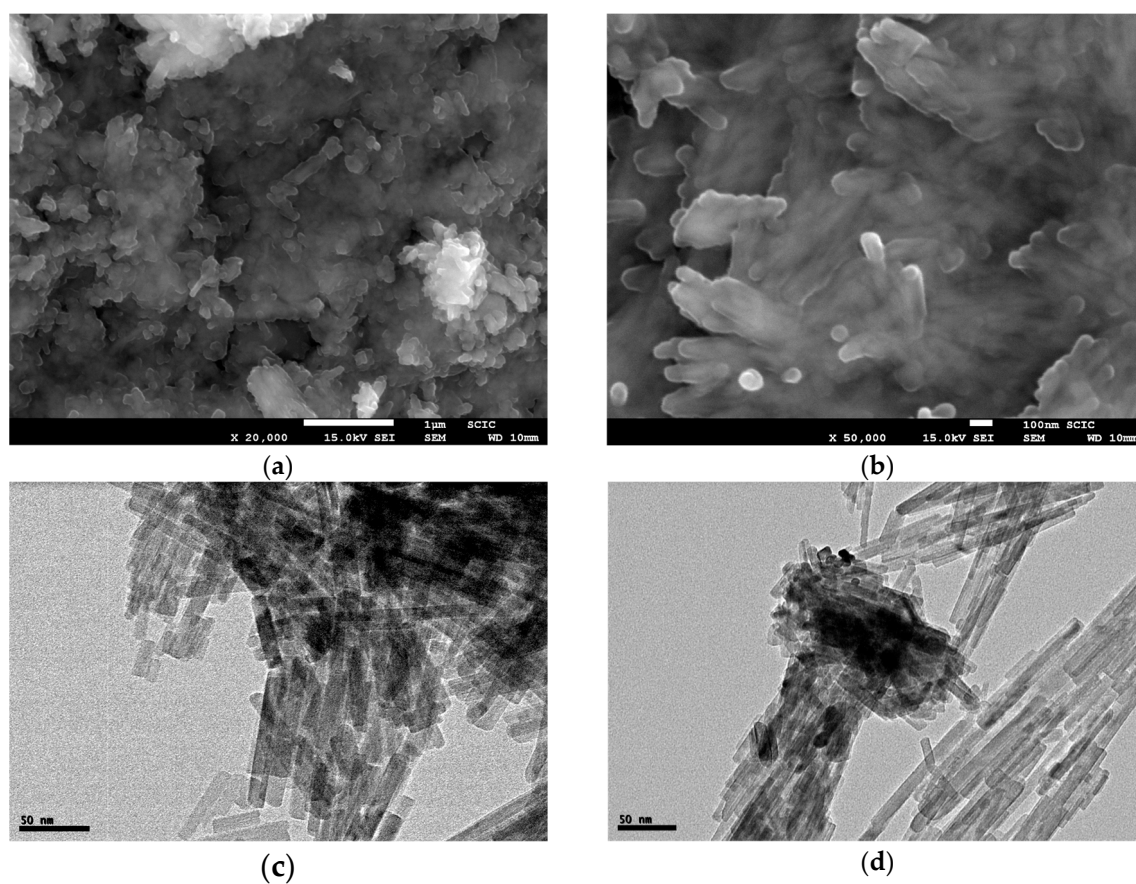

**Figure S2.** FE-SEM images (a,b); and TEM images (c,d) of as-prepared reference  $\text{CePO}_4$  (non-templated, 60 °C-dried and washed sample).

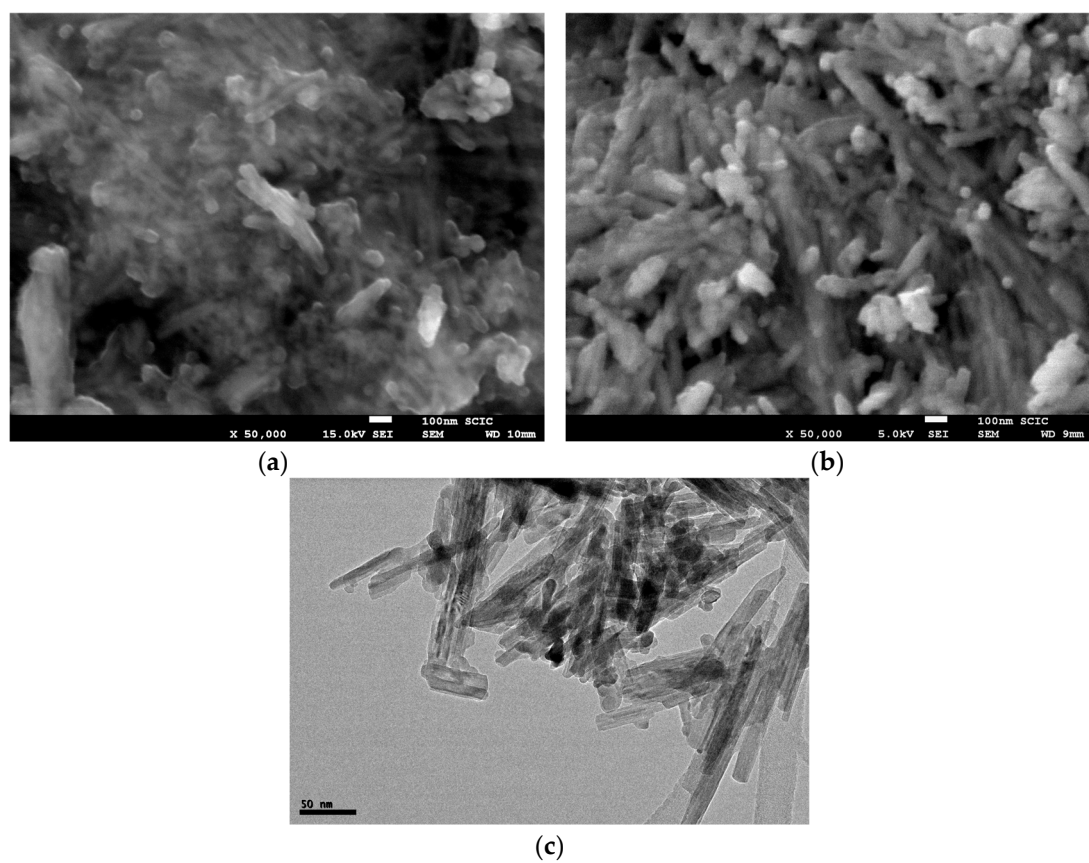

**Figure S3.** FE-SEM (a,b); and TEM images (c) of non-templated reference  $\text{CePO}_4$  annealed at 600 °C.

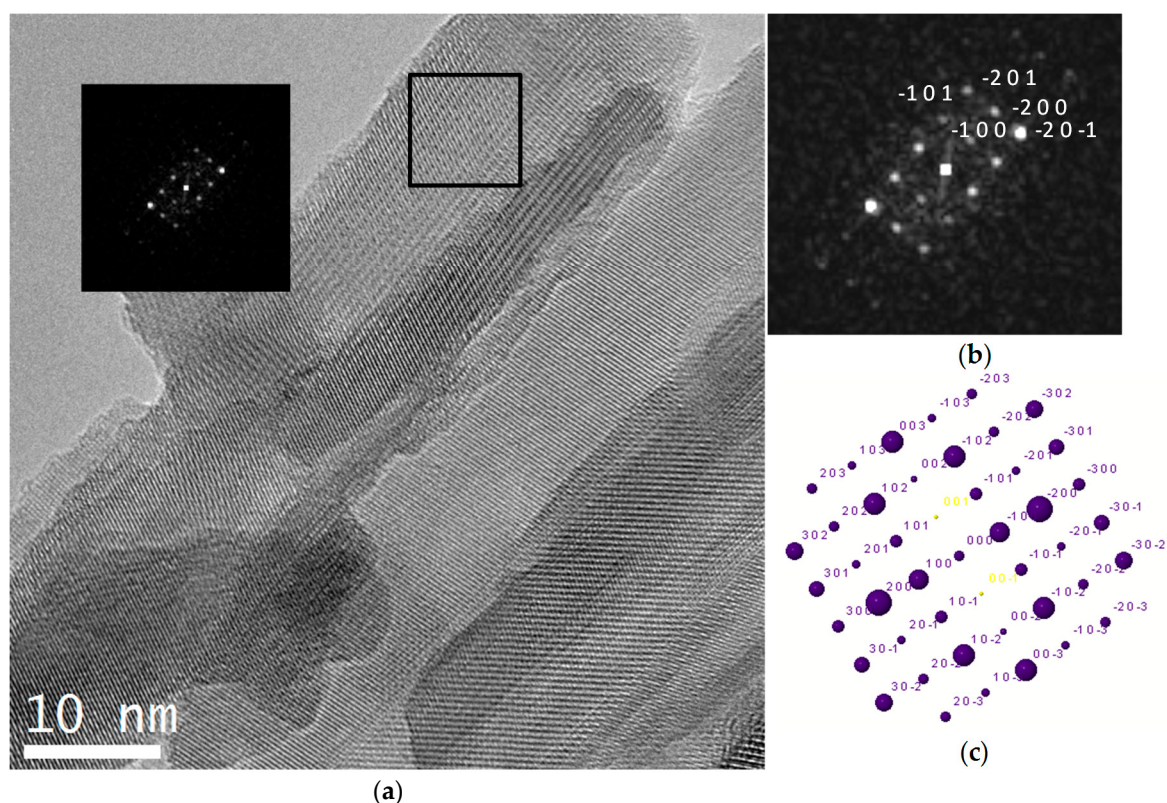

**Figure S4.** (a) HREM image of representative nanofibers of C12GA-templated nanofibrous  $\text{CePO}_4$  annealed at 600 °C under air conditions, the inset showing the corresponding digital diffraction pattern (DDP) of the region of the nanofiber marked with an square; (b) the same DDP taken along the [010] zone axis, indicating some indexed ( $hkl$ ) facets, which must be unambiguously assigned to hexagonal  $\text{CePO}_4$ ; and (c) the corresponding simulated kinetic diffraction diagram.

The HRTEM image of Figure S4 shows some of these nanofibrils (around 10-15 nm thick), and the corresponding digital diffraction pattern (DDP) presents diffraction spots associated to inter-planar distances and angles ( $d_1/d_2/\text{angle}$ : 0.46/0.28/20.0, 0.46/0.31/43.4 and 0.46/0.61/42.8) that can only be assigned to hexagonal  $\text{CePO}_4$ . The DDP of Figure S4b shows the assignment of some of these spots to the corresponding (hkl) lattice planes of the hexagonal system ([uvw] zone axis: [010]), and the corresponding simulated kinetic diffraction diagram is also shown in Figure S4c.

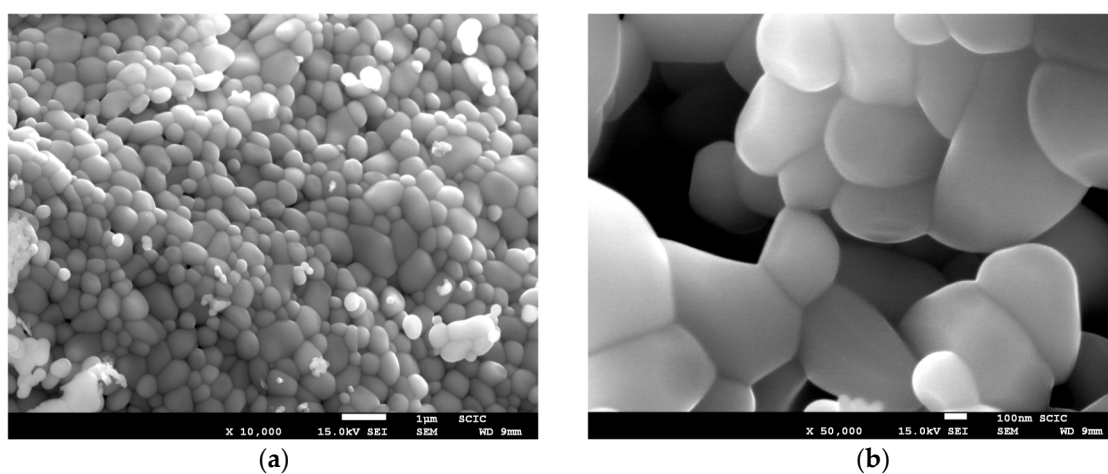

**Figure S5.** FE-SEM images corresponding to non-templated reference  $\text{CePO}_4$  annealed at 900 °C (under air conditions). **(a)** lower magnification ( $\times 10000$ ); **(b)** higher magnification ( $\times 50000$ ).

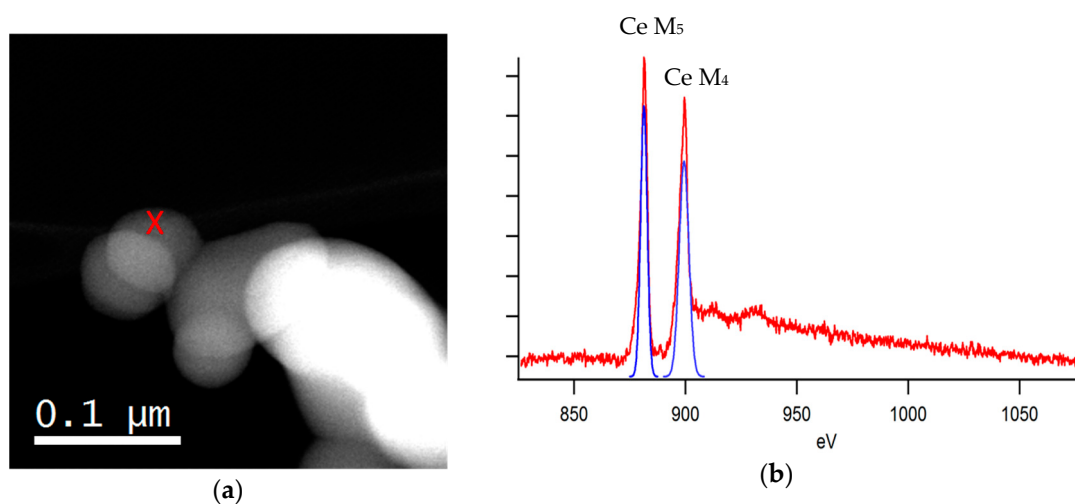

**Figure S6.** STEM-HAADF image (a); and corresponding EELS spectrum (b) of as-prepared (60 °C-dried) non-templated reference  $\text{CePO}_4$ .
